# Supplementary material for: Biological functions of the autophagy-related proteins Atg4 and Atg8 in Cryptococcus neoformans
Source: PLOS journal article supplement (doi:10.1371/journal.pone.0230981), 2020-04-06
Supplement: S1 (10.1371/journal.pone.0230981.s001) [file journal.pone.0230981.s001]

## **S1\_Raw\_Images. Raw blot and electrophoresis gel images used in this manuscript.**

**S1\_Raw\_Figs1-4:** Western blot images were visualized using ImageQuant LAS (GE Healthcare) with the following setting conditions: Chemiluminescence Method, Exposure Time defined as Auto and Standard Sensitivity/Resolution.

**S1\_Raw\_Fig5:** Electrophoresis gel images was captured using ImageQuant LAS (GE Healthcare) with the following setting conditions: EtBr UV (Trans-illumination) Fluorescence Method, Exposure Time defined as Auto and Standard Sensitivity/Resolution.

**S1\_Raw\_Figs6-7:** Southern blot images were visualized using ImageQuant LAS (GE Healthcare) with the following setting conditions: Chemiluminescence Method, Exposure Time defined as Auto and Standard Sensitivity/Resolution.

All captured blot and gel images were exported to TIF format and cropped to be used in the main body and in the supplementary information of this manuscript.

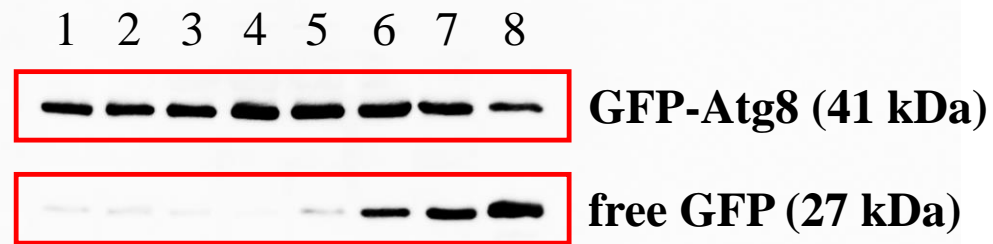

**KN99 $\alpha$  (anti-GFP):**

- 1: 0h induction in YPD
- 2: 1h induction in YPD
- 3: 2h induction in YPD
- 4: 4h induction in YPD
- 5: 0h induction in SD/-N/-AA
- 6: 1h induction in SD/-N/-AA
- 7: 2h induction in SD/-N/-AA
- 8: 4h induction in SD/-N/-AA

**S1\_Raw\_Fig1.** Raw Western blot image of GFP-Atg8 expressions in KN99 $\alpha$  (correspond to Figure 4A top pannel).

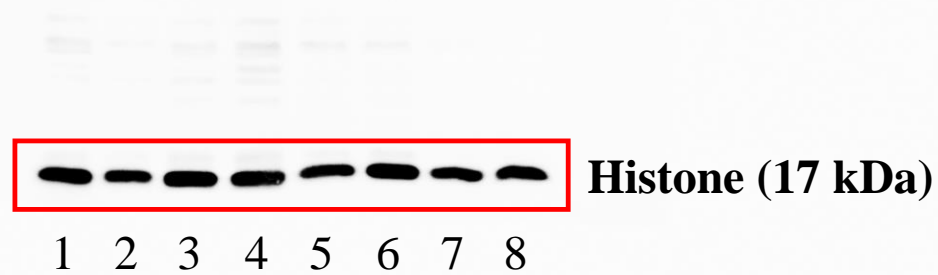

**KN99 $\alpha$  (anti-histone):**

1: 0h induction in YPD

2: 1h induction in YPD

3: 2h induction in YPD

4: 4h induction in YPD

5: 0h induction in SD/-N/-AA

6: 1h induction in SD/-N/-AA

7: 2h induction in SD/-N/-AA

8: 4h induction in SD/-N/-AA

**S1\_Raw\_Fig2.** Raw Western blot image of histone expressions in KN99 $\alpha$  (correspond to Figure 4A bottom panel). The S1\_Raw\_Fig1 membrane was stripped to remove anti-GFP antibody and then incubated with primary rabbit anti-histone.

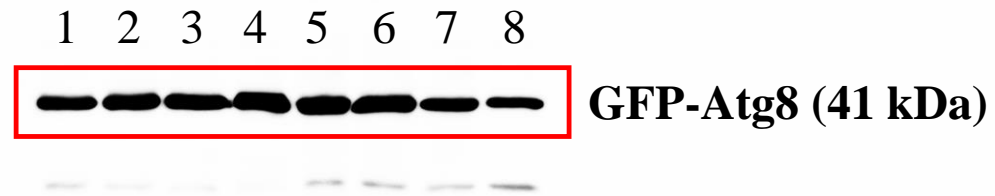

***atg4* (anti-GFP):**

- 1: 0h induction in YPD
- 2: 1h induction in YPD
- 3: 2h induction in YPD
- 4: 4h induction in YPD
- 5: 0h induction in SD/-N/-AA
- 6: 1h induction in SD/-N/-AA
- 7: 2h induction in SD/-N/-AA
- 8: 4h induction in SD/-N/-AA

**S1\_Raw\_Fig3.** Raw Western blot image of GFP-Atg8 expressions in *atg4* mutant (correspond to Figure 4B top pannel).

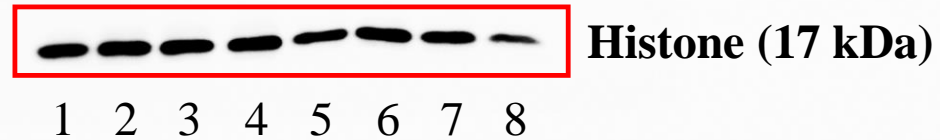

***atg4* (anti-histone):**

- 1: 0h induction in YPD
- 2: 1h induction in YPD
- 3: 2h induction in YPD
- 4: 4h induction in YPD
- 5: 0h induction in SD/-N/-AA
- 6: 1h induction in SD/-N/-AA
- 7: 2h induction in SD/-N/-AA
- 8: 4h induction in SD/-N/-AA

**S1\_Raw\_Fig4.** Raw Western blot image of histone expressions in *atg4* mutant (correspond to Figure 4B bottom pannel). The S1\_Raw\_Fig3 membrane was stripped to remove anti-GFP antibody and then incubated with primary rabbit anti-histone.

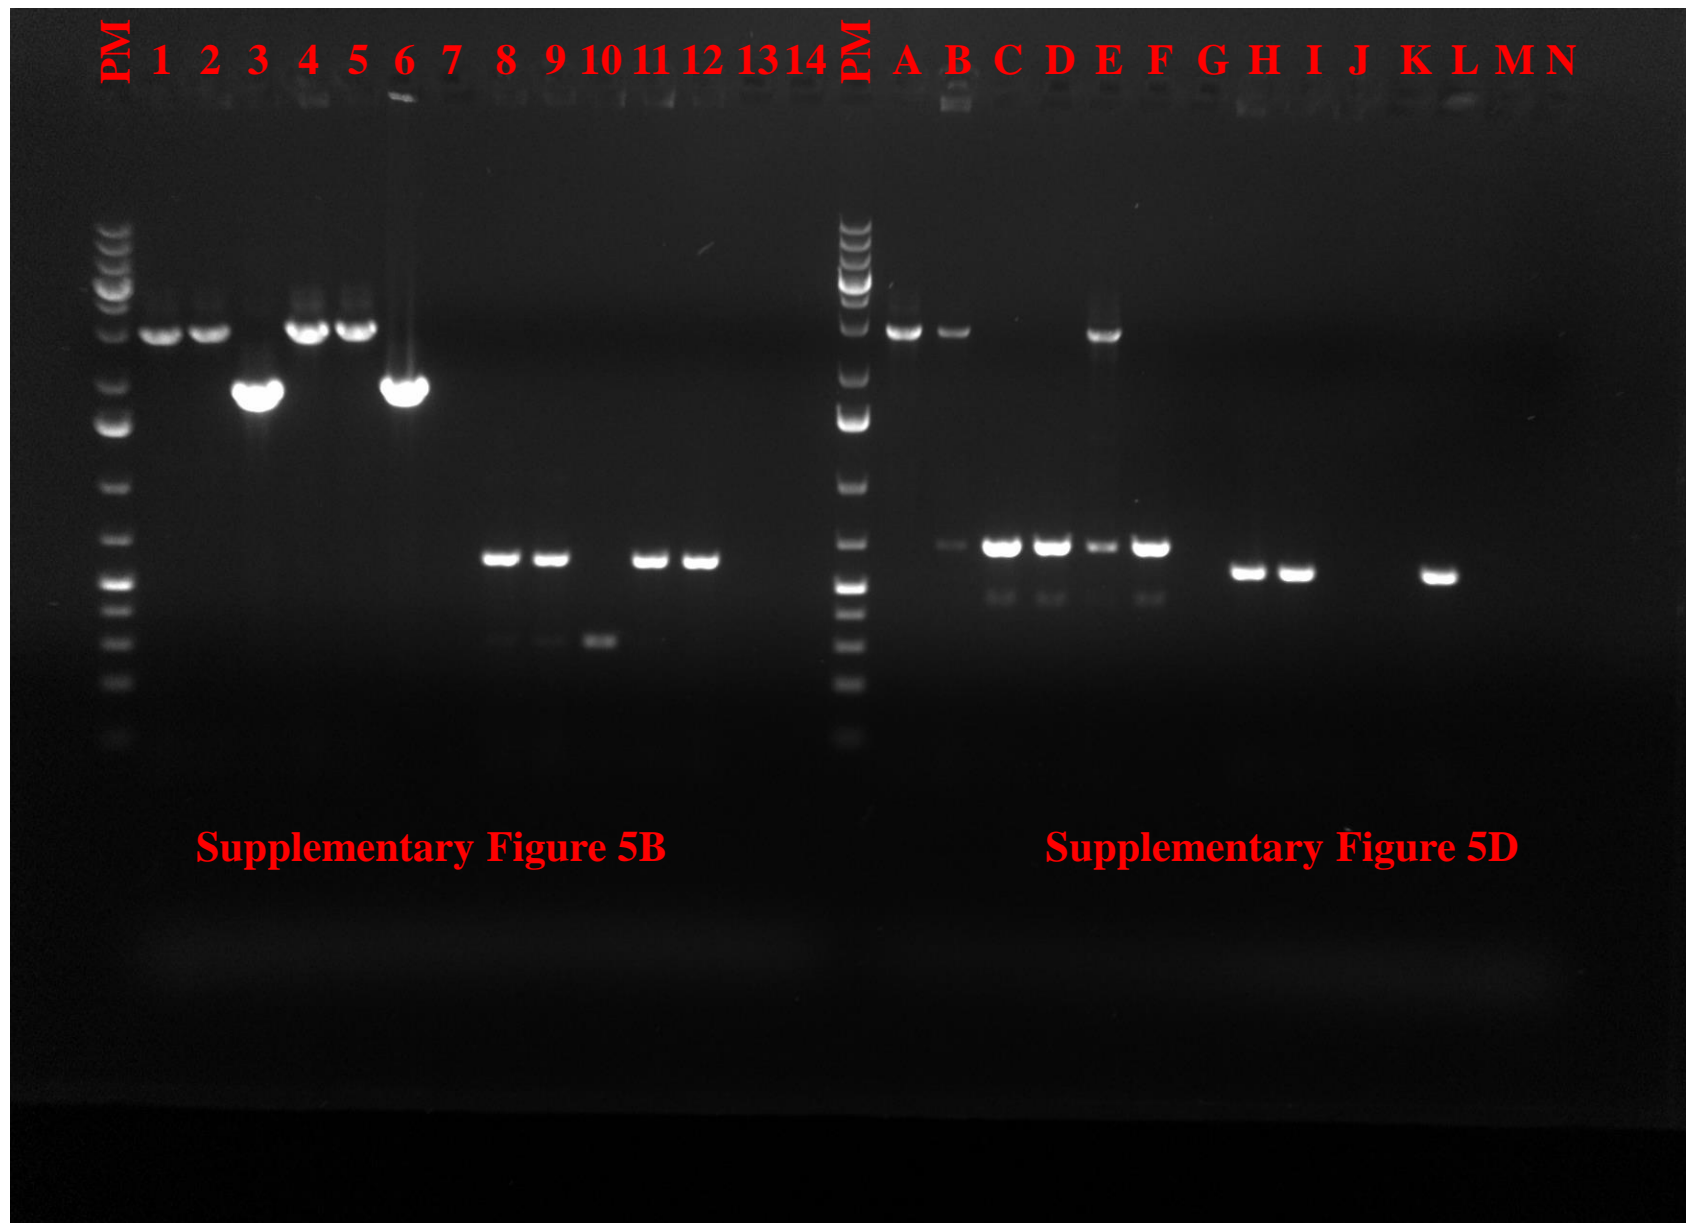

### Supplementary Figure 5B

**1-7:** Confirmatory PCR for *ATG4* deletion diagnosis using the primers: Atg4ScF and Atg4ScR.

**8-14:** Confirmatory PCR for *ATG4* deletion diagnosis using the primers: Atg4ScF and KanMXR.

### Supplementary Figure 5D

**A-G:** Confirmatory PCR for *ATG8* deletion diagnosis using the primers: Atg8ScF and Atg8ScR.

**H-N:** Confirmatory PCR for *ATG4* deletion diagnosis using the primers: Atg8ScF and KanMXR.

**PM:** 1 Kb Plus DNA Ladder (Thermo Fischer Scientific)

**S1\_Raw\_Fig5.** Raw electrophoresis gel image of the *ATG4* (YNL223W) and *ATG8* (YBL078C) genes deletion in *S. cerevisiae* (correspond to Supplementary Figures 5B and 5D).

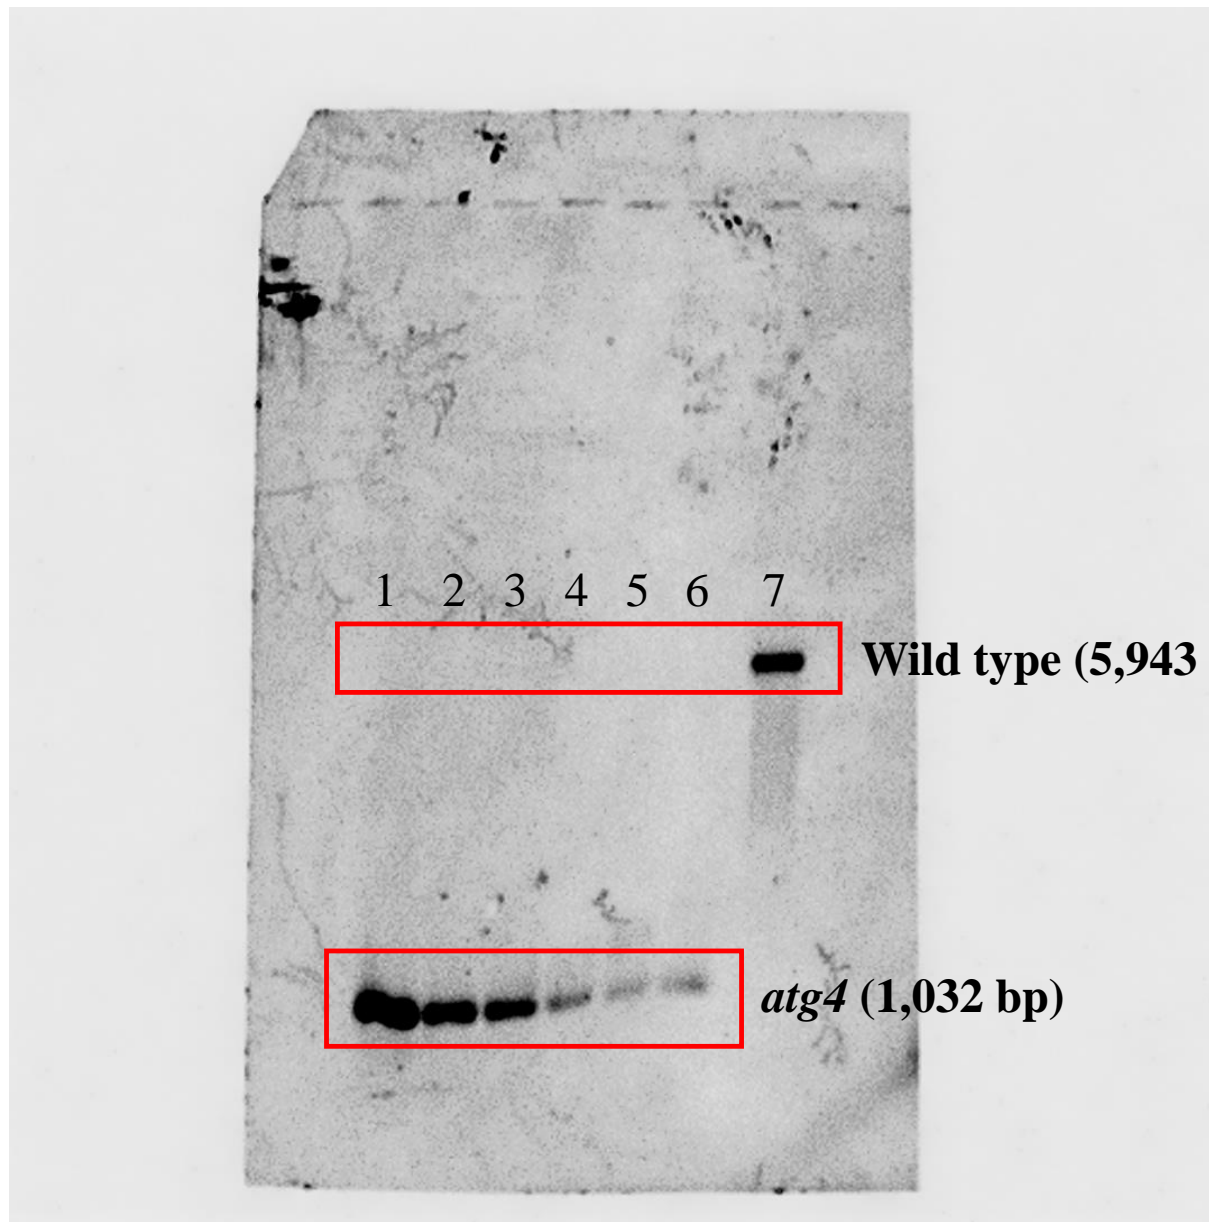

- 1: colony 1 growing in YPD+Hyg
- 2: colony 2 growing in YPD+Hyg
- 3: colony 3 growing in YPD+Hyg
- 4: colony 4 growing in YPD+Hyg
- 5: colony 5 growing in YPD+Hyg
- 6: colony 6 growing in YPD+Hyg
- 7: KN99 $\alpha$  (WT)

**S1\_Raw\_Fig6.** Raw Southern blot image of the *ATG4* (CNAG\_02662) gene deletion in *C. neoformans* (correspond to Supplementary Figures 6B).

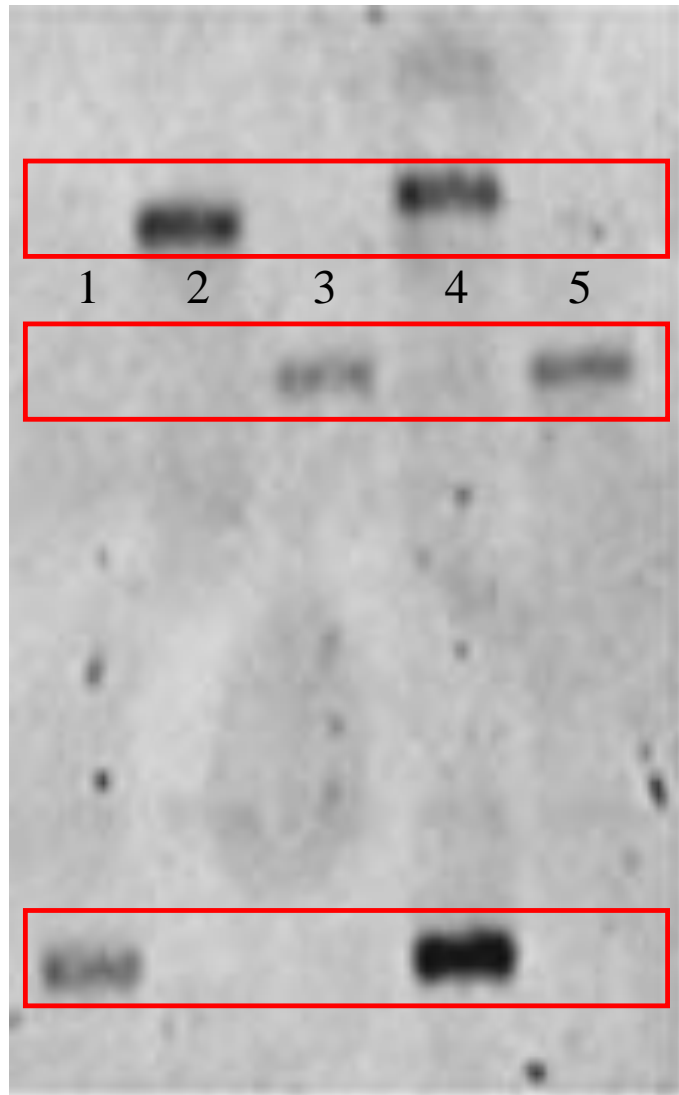

**Non-homologous integration**

***atg8* (6,150 bp)**

**Wild type (1,996 bp)**

1: KN99 $\alpha$  (WT)

2: colony 1 growing in YPD+Hyg

3: colony 2 growing in YPD+Hyg

4: colony 3 growing in YPD+Hyg

5: colony 4 growing in YPD+Hyg

**S1\_Raw\_Fig7.** Southern blot image of the *ATG8* (CNAG\_00816) gene deletion in *C. neoformans* (correspond to Supplementary Figures 6D). This is not the raw figure, but is the crop made soon after the capture, I retrieved it from an email the student sent. The raw captured image was lost when the computer HD crashed.
